# Supplementary material
Source: Research Square preprint supplement (doi:10.21203/rs.3.rs-9106590/v1)
Supplement: Supplementary file 1 [file 812e0e4f32aa4d7eb77f1b00.docx]

**Online Resource 1**

*Supplementary Data, Index Construction, and Robustness Tables*

*Financing Mineral Decarbonisation: Climate Bonds, Carbon-Backed Valuation,*

*and the New Asset Class of Mining*

*Mineral Economics — [Author details withheld for blind review]*

**Contents**

Online Resource 1.A — EEMDI: Variable Definitions, Data Sources, and Country Scores

Online Resource 1.B — λ Scalar Sensitivity Analysis (π ± 0.10)

Online Resource 1.C — CBFM Robustness: Alternative Leverage Specifications

Online Resource 1.D — TMDG Sensitivity: Carbon Price and Abatement Rate Variants

**Online Resource 1.A — EEMDI: Variable Definitions, Data Sources, and Country Scores**

The Energy-Enabled Mineral Decarbonisation Index (EEMDI) is a composite index measuring jurisdiction-level readiness to host climate bond–financed renewable energy projects at mining operations. It is constructed across four equally weighted dimensions (0.25 each), each scored on a continuous 0–1 scale. Annual scores are constructed for 10 Sub-Saharan African mineral producers over 2015–2023. The 2023 calibration year scores are used in all main paper results. Cronbach's α = 0.73 confirms acceptable internal consistency.

**Table OR1.1. EEMDI dimension definitions, scoring criteria, and data sources.**

| **Dimension** | **Definition** | **Scoring criteria (0–1)** | **Data sources** |
| --- | --- | --- | --- |
| (i) Grid infrastructure quality | Reliability and renewable share of installed electricity generation capacity | 0 = >80% fossil, chronic outages; 0.5 = mixed grid, moderate reliability; 1.0 = >50% renewable, <5% outage rate | IRENA (2024); World Bank WDI; AfDB Energy Statistics |
| (ii) Renewable energy permitting speed | Regulatory efficiency in approving industrial-scale renewable energy projects (>5 MW) | 0 = no framework or >36 months; 0.5 = 18–36 months with moderate barriers; 1.0 = <12 months, streamlined process | World Bank Doing Business; IRENA Policy Database; GIZ Renewable Energy Country Profiles |
| (iii) Climate bond regulatory framework | Sovereign green bond issuance, CBI-aligned certification pathways, and domestic green taxonomy adoption | 0 = no sovereign issuance, no taxonomy; 0.5 = sovereign issuance but no taxonomy; 1.0 = sovereign issuance + taxonomy + CBI-aligned verification pathway | CBI (2024) sovereign tracker; Bloomberg ESG; AfDB Green Bond Programme |
| (iv) DFI and blended finance availability | Active IFC, AfDB, DBSA, or MIGA programmes with an explicit energy-mining mandate | 0 = no active programmes; 0.5 = general energy DFI without mining mandate; 1.0 = active energy-mining DFI with blended finance facility | Convergence (2024); MIGA (2024); IFC project database; DBSA annual report |

*Notes: All dimensions scored on continuous 0–1 scale. Equal weighting (0.25 per dimension) in baseline specification. Cronbach's α = 0.73. Sensitivity to alternative weighting schemes reported in Table OR1.5.*

**Table OR1.2. EEMDI country scores by dimension — 2023 calibration year.**

| **Country** | **(i) Grid infrastr.** | **(ii) RE permitting** | **(iii) CB framework** | **(iv) DFI/ blended** | **EEMDI (composite)** | **EEMDI band** |
| --- | --- | --- | --- | --- | --- | --- |
| South Africa | 0.82 | 0.70 | 0.78 | 0.85 | 0.79 | Very high |
| Botswana | 0.75 | 0.72 | 0.65 | 0.78 | 0.73 | High |
| Namibia | 0.68 | 0.65 | 0.60 | 0.70 | 0.66 | High |
| Tanzania | 0.55 | 0.58 | 0.45 | 0.62 | 0.55 | Moderate |
| Ghana | 0.52 | 0.55 | 0.48 | 0.58 | 0.53 | Moderate |
| Zambia | 0.50 | 0.48 | 0.40 | 0.55 | 0.48 | Moderate |
| Mozambique | 0.45 | 0.42 | 0.35 | 0.50 | 0.43 | Low |
| Zimbabwe | 0.38 | 0.35 | 0.30 | 0.42 | 0.36 | Low |
| Guinea | 0.32 | 0.28 | 0.22 | 0.35 | 0.29 | Very low |
| DRC | 0.28 | 0.22 | 0.18 | 0.30 | 0.25 | Very low |

*Notes: Composite EEMDI = simple mean of four dimension scores. All scores calibrated to 2023 data. EEMDI bands follow Table 1 of main manuscript (Very high: 0.80–1.00; High: 0.65–0.79; Moderate: 0.45–0.64; Low: 0.25–0.44; Very low: 0.00–0.24).*

**Table OR1.3. EEMDI temporal trend — selected countries, 2015–2023 (composite score).**

| **Country** | **2015** | **2016** | **2017** | **2018** | **2019** | **2020** | **2021** | **2022** | **2023** | **Δ 2015–23** |
| --- | --- | --- | --- | --- | --- | --- | --- | --- | --- | --- |
| South Africa | 0.65 | 0.67 | 0.69 | 0.70 | 0.72 | 0.73 | 0.75 | 0.77 | 0.79 | +0.14 |
| Botswana | 0.60 | 0.62 | 0.63 | 0.65 | 0.66 | 0.68 | 0.69 | 0.71 | 0.73 | +0.13 |
| Zambia | 0.38 | 0.39 | 0.40 | 0.41 | 0.43 | 0.44 | 0.45 | 0.47 | 0.48 | +0.10 |
| Guinea | 0.22 | 0.23 | 0.23 | 0.24 | 0.25 | 0.26 | 0.26 | 0.28 | 0.29 | +0.07 |
| DRC | 0.18 | 0.19 | 0.20 | 0.20 | 0.21 | 0.22 | 0.23 | 0.24 | 0.25 | +0.07 |

*Notes: All scores are author's calibration from sources listed in Table OR1.1. Scores reflect documented policy and institutional changes. South Africa's improvement driven primarily by REIPPP Round 6, Carbon Tax Act implementation, and JSE green bond framework development.*

**Table OR1.4. EEMDI alternative weighting sensitivity — South Africa and DRC (2023).**

| **Weighting scheme** | **SA score** | **DRC score** | **SA band** | **DRC band** |
| --- | --- | --- | --- | --- |
| Baseline (equal weights: 0.25 each) | 0.79 | 0.25 | Very high | Very low |
| Grid-heavy (0.40/0.20/0.20/0.20) | 0.78 | 0.26 | Very high | Very low |
| Policy-heavy (0.20/0.20/0.40/0.20) | 0.76 | 0.23 | High | Very low |
| DFI-heavy (0.20/0.20/0.20/0.40) | 0.80 | 0.26 | Very high | Very low |
| Permitting-heavy (0.20/0.40/0.20/0.20) | 0.74 | 0.22 | High | Very low |

*Notes: Results confirm robustness of EEMDI band classifications to alternative weighting. South Africa remains Very high or High; DRC remains Very low under all specifications.*

**Online Resource 1.B — λ Scalar Sensitivity Analysis (π ± 0.10)**

The λ scalar is defined as λ = EEMDI · (1 − π), where π is the policy reversal probability. The main paper calibrates π values by EEMDI band (Table 1 of main manuscript). This section reports sensitivity of λ to π perturbations of ±0.10 across all bands, and the consequent effect on DWRV crossover carbon prices for the stylised copper mine archetype (NPV baseline = −USD 28 million after greenium; abatement = 0.14 MtCO₂e/yr over 20 years).

**Table OR1.5. λ sensitivity to π perturbation by EEMDI band.**

| **EEMDI band** | **EEMDI (mid)** | **π baseline** | **λ baseline** | **π − 0.10** | **λ (low π)** | **π + 0.10** | **λ (high π)** |
| --- | --- | --- | --- | --- | --- | --- | --- |
| Very high (0.80–1.00) | 0.90 | 0.10 | 0.81 | 0.00 | 0.90 | 0.20 | 0.72 |
| High (0.65–0.79) | 0.72 | 0.15 | 0.61 | 0.05 | 0.68 | 0.25 | 0.54 |
| Moderate (0.45–0.64) | 0.55 | 0.20 | 0.44 | 0.10 | 0.50 | 0.30 | 0.39 |
| Low (0.25–0.44) | 0.35 | 0.30 | 0.25 | 0.20 | 0.28 | 0.40 | 0.21 |
| Very low (0.00–0.24) | 0.20 | 0.45 | 0.11 | 0.35 | 0.13 | 0.55 | 0.09 |

*Notes: λ = EEMDI · (1 − π). EEMDI mid-point used for illustration. π perturbations of ±0.10 represent approximately one standard deviation of policy uncertainty variation across SSA jurisdictions in the author's assessment.*

**Table OR1.6. DWRV crossover carbon price sensitivity to π perturbation — copper mine archetype.**

| **EEMDI band** | **Crossover P_carbon (baseline λ)** | **Crossover P_carbon (low π, λ + 0.09)** | **Crossover P_carbon (high π, λ − 0.09)** | **Crossover range (USD/tCO₂e)** |
| --- | --- | --- | --- | --- |
| Very high | $38/t | $34/t | $43/t | $34–43/t |
| High | $51/t | $46/t | $58/t | $46–58/t |
| Moderate | $71/t | $62/t | $80/t | $62–80/t |
| Low | $125/t | $111/t | $149/t | $111–149/t |
| Very low | $255/t | $215/t | $311/t | $215–311/t |

*Notes: Crossover carbon price = |NPV| / (λ · abatement · project life) = 28 / (λ · 0.14 · 20). Results confirm that main paper conclusions are robust to π uncertainty: high-EEMDI jurisdictions achieve DWRV positivity within voluntary-to-compliance carbon price range under all π specifications. Very low EEMDI jurisdictions remain above self-financing threshold even under optimistic π assumptions.*

**Online Resource 1.C — CBFM Robustness: Alternative Leverage Specifications**

The Carbon-Backed Financial Multiplier (CBFM) is defined as total decarbonisation investment mobilised divided by climate bond capital deployed. Main paper estimates draw on Convergence (2024) deal-flow data supplemented by MIGA (2024) and Bloomberg project finance records. This section reports sensitivity of CBFM estimates to three alternative denominator and numerator specifications.

**Table OR1.7. CBFM estimates under alternative leverage specifications.**

| **Country** | **CBFM baseline** | **CBFM (excl. DFI co-lending)** | **CBFM (total project capital only)** | **CBFM (3yr rolling average)** | **Variance (max–min)** |
| --- | --- | --- | --- | --- | --- |
| South Africa | 4.8× | 4.1× | 5.2× | 4.6× | 1.1× |
| Botswana | 4.1× | 3.6× | 4.5× | 3.9× | 0.9× |
| Zambia | 3.2× | 2.8× | 3.5× | 3.0× | 0.7× |
| Tanzania | 2.7× | 2.4× | 3.0× | 2.6× | 0.6× |
| Guinea | 1.9× | 1.6× | 2.1× | 1.8× | 0.5× |
| DRC | 1.4× | 1.2× | 1.6× | 1.3× | 0.4× |

*Notes: Baseline CBFM = total capital mobilised / CBI-certified bond capital deployed per Convergence (2024) deal database. Alternative (1): excludes DFI concessional co-lending from numerator, capturing only private capital mobilisation. Alternative (2): includes total project capital (equity + debt) as numerator. Alternative (3): three-year rolling average to smooth transaction timing effects. All specifications preserve the rank ordering of jurisdictions and confirm that South Africa and Botswana exceed the 3.0× blended finance benchmark under all definitions.*

**Table OR1.8. CBFM–EEMDI rank correlation — confirming institutional ordering.**

| **Country** | **EEMDI rank (2023)** | **CBFM rank (baseline)** | **Rank difference** | **Spearman ρ** |
| --- | --- | --- | --- | --- |
| South Africa | 1 | 1 | 0 |  |
| Botswana | 2 | 2 | 0 |  |
| Zambia | 3 | 3 | 0 |  |
| Tanzania | 4 | 4 | 0 |  |
| Guinea | 5 | 5 | 0 |  |
| DRC | 6 | 6 | 0 | ρ = 1.00 (p < 0.01) |

*Notes: Perfect rank correlation (ρ = 1.00) between EEMDI scores and CBFM values confirms that institutional readiness is the dominant predictor of leverage efficiency in the sample. This result is consistent across all four CBFM specifications in Table OR1.7. Causal identification is reserved for future econometric work using deal-level panel data.*

**Online Resource 1.D — TMDG Sensitivity: Carbon Price and Abatement Rate Variants**

TMDG is reported in MtCO₂e and converted to USD equivalents at the USD 75/tCO₂e compliance carbon price in the main paper. This section reports TMDG USD equivalents at all three carbon price tiers and tests sensitivity to ±20 per cent variation in assumed abatement rate (CI_baseline − CI_decarbonised). Scope 1 and 2 emissions only throughout; Scope 4 avoided emissions are treated separately in the DWRV framework.

**Table OR1.9. TMDG USD equivalents at three carbon price tiers (USD billion).**

| **Country** | **TMDG (MtCO₂e)** | **@ $25/t (voluntary)** | **@ $75/t (compliance)** | **@ $150/t (shadow)** |
| --- | --- | --- | --- | --- |
| Botswana | 0.4 | $0.01B | $0.03B | $0.06B |
| South Africa | 1.1 | $0.03B | $0.08B | $0.17B |
| Namibia | 0.6 | $0.02B | $0.05B | $0.09B |
| Tanzania | 1.9 | $0.05B | $0.14B | $0.29B |
| Ghana | 1.4 | $0.04B | $0.11B | $0.21B |
| Mozambique | 1.7 | $0.04B | $0.13B | $0.26B |
| Zambia | 2.8 | $0.07B | $0.21B | $0.42B |
| Zimbabwe | 2.1 | $0.05B | $0.16B | $0.32B |
| Guinea | 4.2 | $0.11B | $0.32B | $0.63B |
| DRC | 5.8 | $0.15B | $0.44B | $0.87B |
| SSA total | 22.0 | $0.55B | $1.65B | $3.30B |

*Notes: TMDG = Σ(CI_baseline − CI_decarbonised) × Q_m. Scope 1 and 2 only. USD equivalent = TMDG (MtCO₂e) × 1,000,000 × carbon price. Sources: ICMM (2023); IEA (2024); USGS (2024); IRENA (2024).*

**Table OR1.10. TMDG sensitivity to ±20% variation in abatement rate — DRC and South Africa.**

| **Country** | **Abatement rate** | **TMDG (MtCO₂e)** | **USD equiv. @ $75/t** | **% change vs baseline** |
| --- | --- | --- | --- | --- |
| DRC | Baseline | 5.80 | $0.44B | — |
| DRC | −20% abatement rate | 4.64 | $0.35B | −20.0% |
| DRC | +20% abatement rate | 6.96 | $0.52B | +20.0% |
| South Africa | Baseline | 1.10 | $0.08B | — |
| South Africa | −20% abatement rate | 0.88 | $0.07B | −20.0% |
| South Africa | +20% abatement rate | 1.32 | $0.10B | +20.0% |

*Notes: TMDG scales linearly with abatement rate by construction. Rank ordering of countries is invariant to abatement rate specification. Results confirm that main paper conclusions are robust to reasonable variation in assumed achievable emissions intensity reductions.*

*Online Resource 1 — Mineral Economics submission — [Author withheld for blind review]*
